# Supplementary material for: A randomised, double-blind trial comparing budesonide formulations and dosages for short-term treatment of eosinophilic oesophagitis
Source: PubMed Central journal article supplement — Gut. 2015 Mar 19;65(3):390–9. doi: 10.1136/gutjnl-2014-308815 (PMC4789829; doi:10.1136/gutjnl-2014-308815), 2015-03-19

**Supplementary Figure 1.** Patient disposition. EOT, end of treatment.

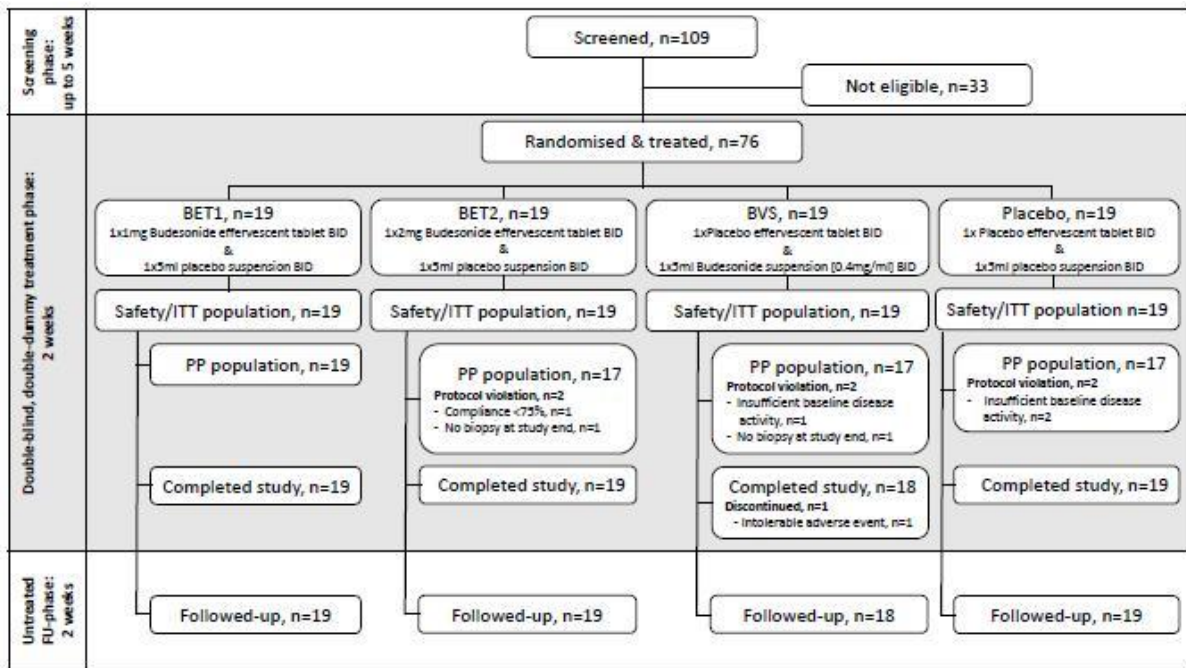

**Supplementary Figure 2:** Effect of treatment on dysphagia. BET1, effervescent tablets for orodispersible use 2 x 1 mg/d; BET2, effervescent tablets for orodispersible use 2 x 2 mg/d ;BVS, budesonide viscous suspension 2 x 5ml [0.4 mg/ml]/d; EOT, end of treatment; PLA, placebo

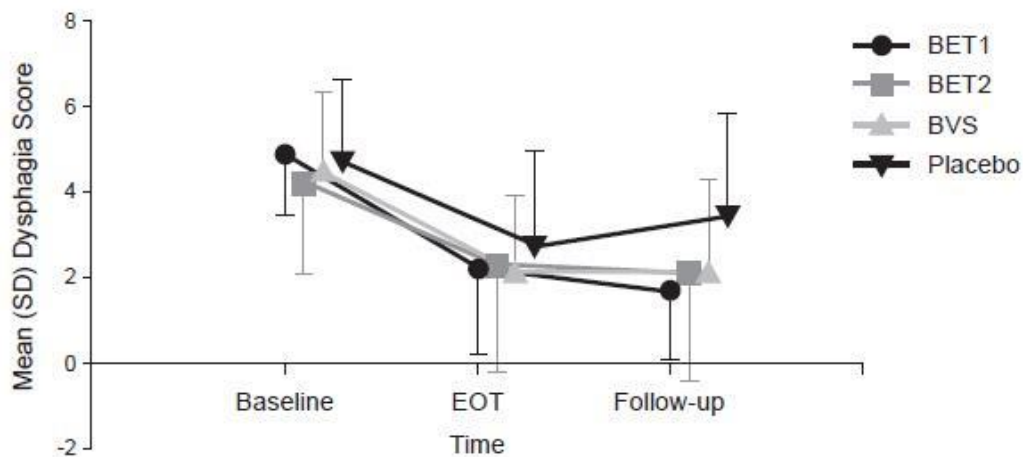

**Supplementary Figure 3:** Effect of treatment on serum cortisol levels. BET1, effervescent tablets for orodispersible use 2 x 1 mg/d; BET2, effervescent tablets for orodispersible use 2 x 2 mg/d ; BVS, budesonide viscous suspension 2 x 5ml [0.4 mg/ml]/d; EOT, end of treatment; LLN, lower limit of normal; PLA, placebo

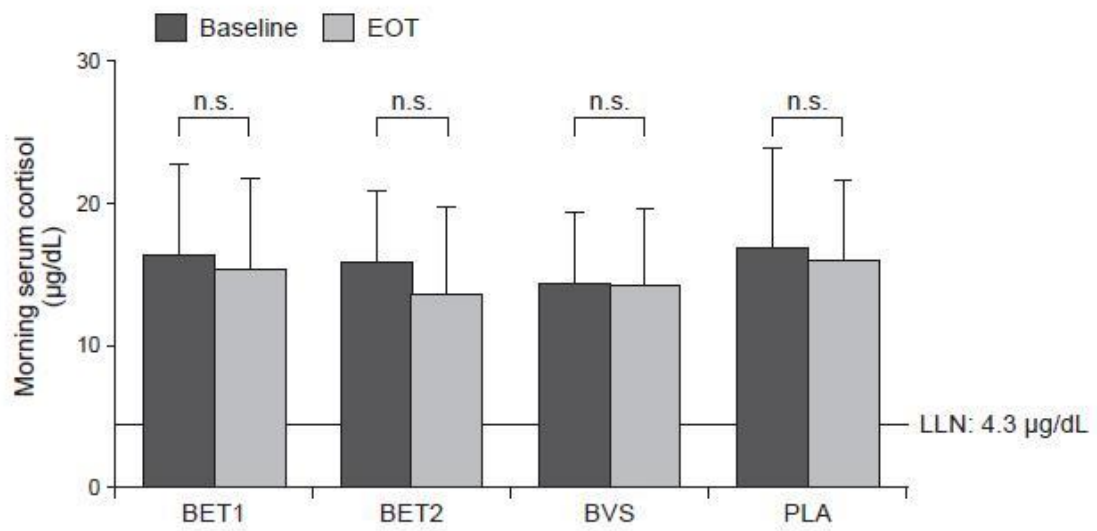

Supplement: gutjnl-2014-308815-s1.pdf [file gutjnl-2014-308815-s1.pdf]
