# Supplementary material for: A randomised, double-blind trial comparing budesonide formulations and dosages for short-term treatment of eosinophilic oesophagitis
Source: PubMed Central journal article supplement — Gut. 2015 Mar 19;65(3):390–9. doi: 10.1136/gutjnl-2014-308815 (PMC4789829; doi:10.1136/gutjnl-2014-308815), 2015-03-19
Supplement: gutjnl-2014-308815-s2.pdf [file gutjnl-2014-308815-s2.pdf]

**Supplementary Table 1:** Number (%) of patients with at least one treatment-emergent suspected adverse drug reaction (side effect) by System Organ Class and preferred term

| <b>System Organ Class</b><br>Preferred term    | <b>BET1</b><br>(n = 19) | <b>BET2</b><br>(n = 19) | <b>BVS</b><br>(n = 19) | <b>PLA</b><br>(n = 19) |
|------------------------------------------------|-------------------------|-------------------------|------------------------|------------------------|
| <b>Gastrointestinal disorders</b>              |                         |                         |                        |                        |
| Nausea                                         | ---                     | 1 (5.3)                 | ---                    | ---                    |
| Oral mucosal blistering                        | ---                     | 1 (5.3)                 | ---                    | ---                    |
| Bowel movement irregularity                    | ---                     | ---                     | 1 (5.3)                | ---                    |
| Lip oedema                                     | ---                     | ---                     | 1 (5.3)                | ---                    |
| <b>Infections and infestations</b>             |                         |                         |                        |                        |
| Oesophageal candidiasis / Fungal oesophagitis  | 3 (15.8)                | 3 (15.8)                | 3 (15.8)               | ---                    |
| <i>Thereof, histologically confirmed cases</i> | <b>2 (10.5)</b>         | <b>2 (10.5)</b>         | <b>2 (10.5)</b>        | ---                    |
| <b>Investigations</b>                          |                         |                         |                        |                        |
| White blood cell count increased               | 1 (5.3)                 | ---                     | ---                    | ---                    |
| Blood cortisol decreased                       | ---                     | 1 (5.3)                 | ---                    | ---                    |
| <b>Skin and subcutaneous tissue disorders</b>  |                         |                         |                        |                        |
| Pruritus                                       | 1 (5.3)                 | ---                     | ---                    | ---                    |
| Urticaria                                      | ---                     | ---                     | 1 (5.3)                | ---                    |

BET1, effervescent tablets for orodispersible use 2 x 1 mg/d; BET2, effervescent tablets for orodispersible use 2 x 2 mg/d ; BVS, budesonide viscous suspension 2 x 5 ml [0.4 mg/ml]/d; PLA, placebo
